# Supplementary material for: Protocol for a cluster-randomised trial to determine the effects of advocacy actions on the salt content of processed foods
Source: Springer Nature journal article supplement (doi:10.1186/s12889-016-2743-4), 2015-12-01
Supplement: MOESM1 [file 9751322]

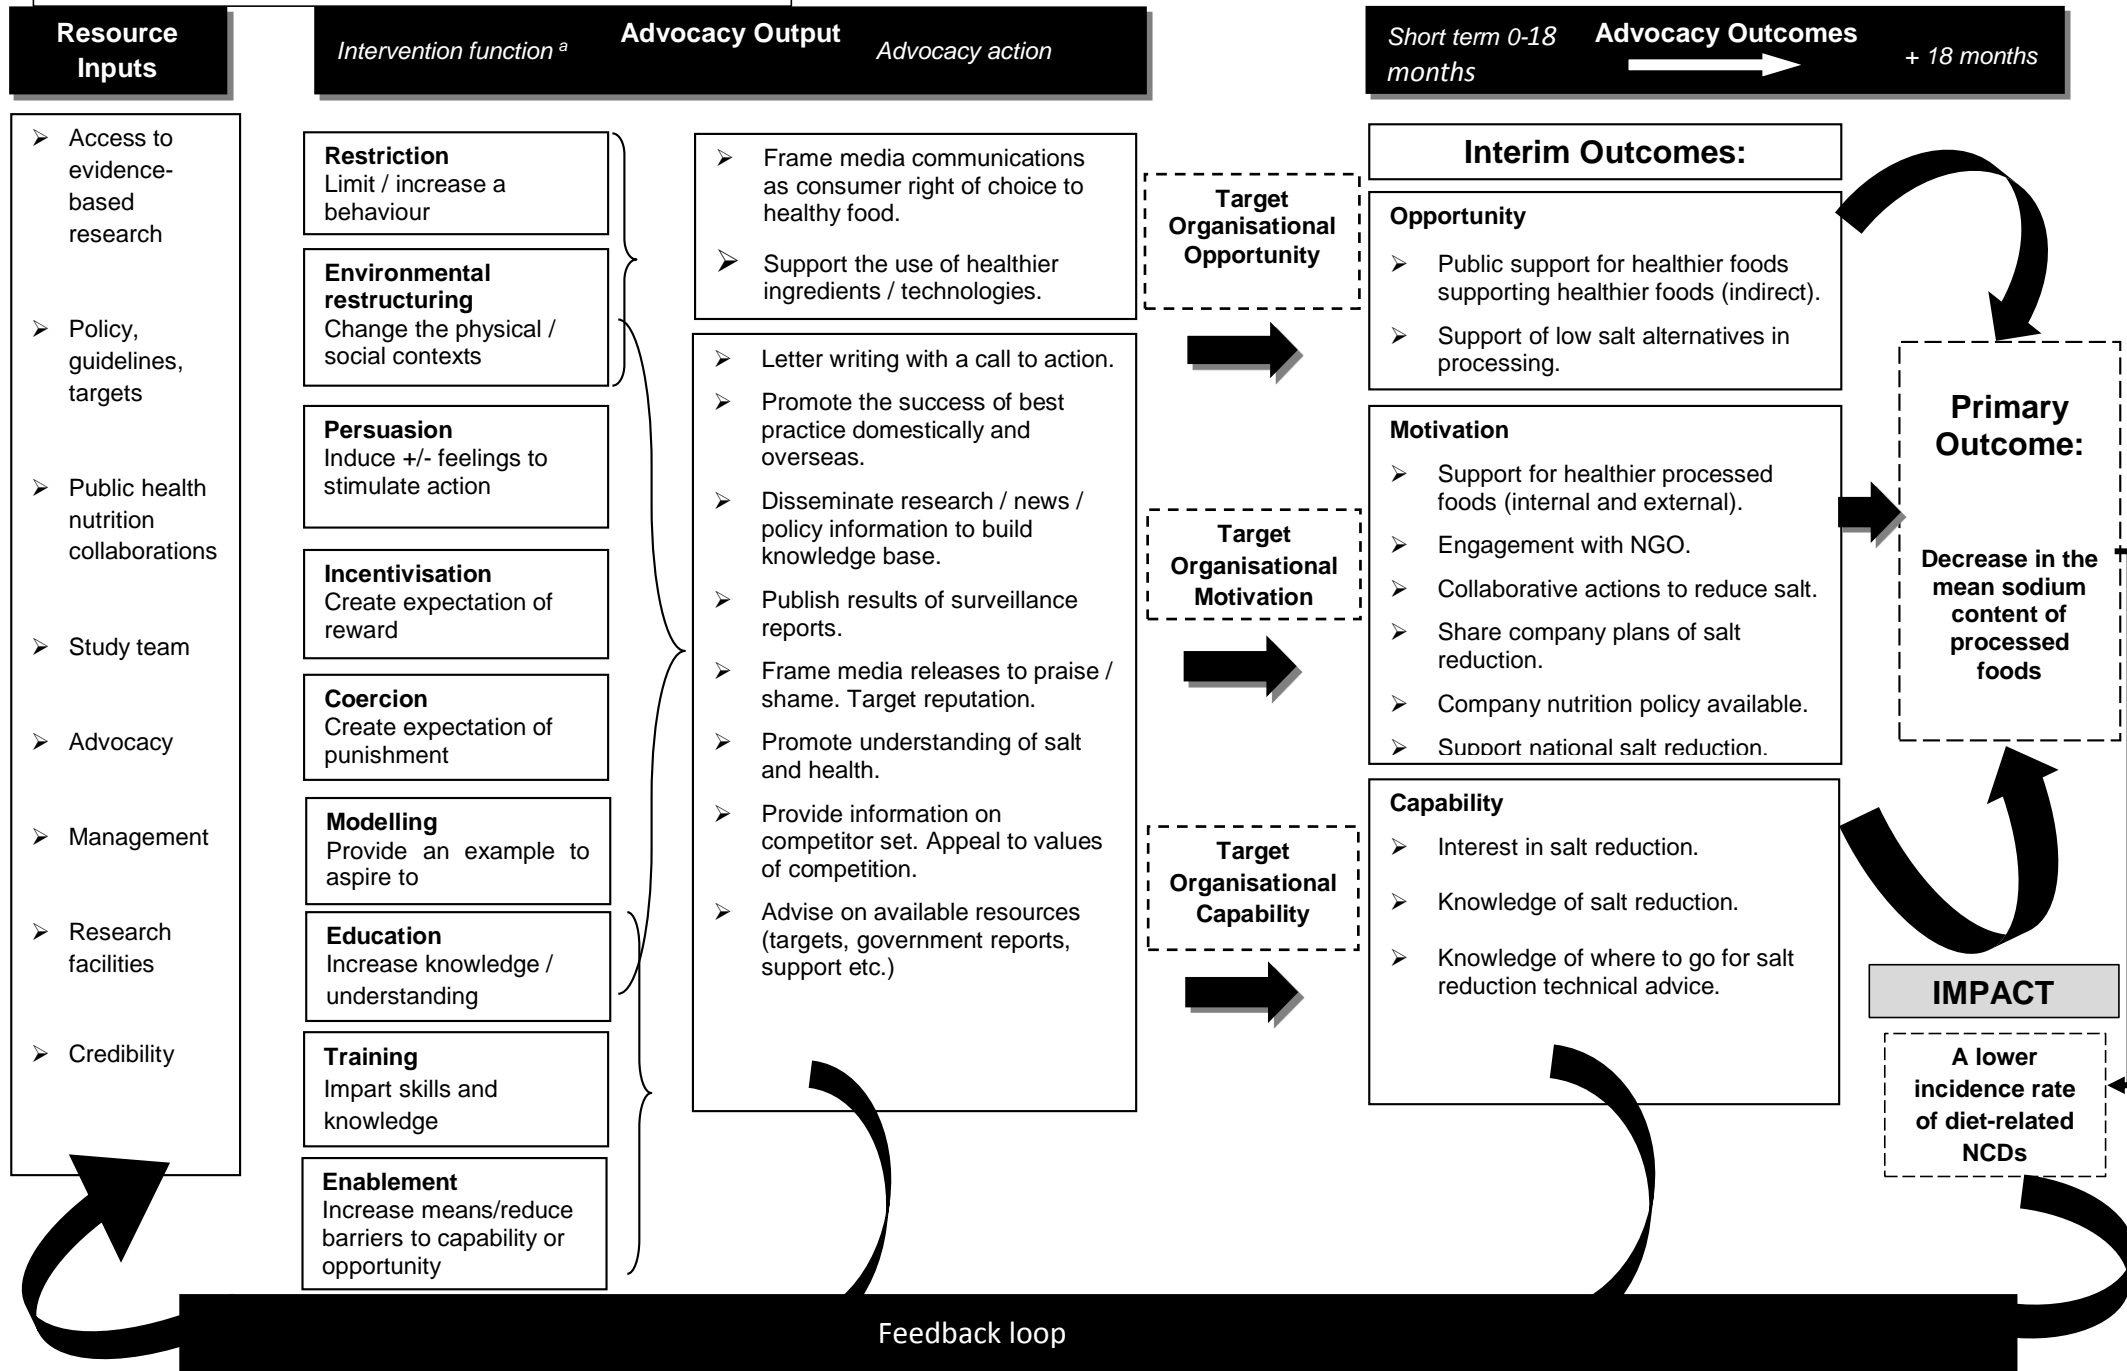

<sup>a</sup>Adapted from Michie S, van Stralen M, West R. The Behaviour change wheel a new method for characterising and designing behaviour change interventions. Implement Sci. 2011;6:42
