# Supplementary material for: Protocol for a cluster-randomised trial to determine the effects of advocacy actions on the salt content of processed foods
Source: Springer Nature journal article supplement (doi:10.1186/s12889-016-2743-4), 2015-12-01
Supplement: MOESM2 [file 9751322]

**Additional File 2** Interim outcomes: examples of the types and sources of data and measures.

| Interim outcome                                                                                                                                                                                                                                                                                                           | Examples of data types                                                                                              | Examples of data sources                                                                      | Measures                                                                                                                                             |
|---------------------------------------------------------------------------------------------------------------------------------------------------------------------------------------------------------------------------------------------------------------------------------------------------------------------------|---------------------------------------------------------------------------------------------------------------------|-----------------------------------------------------------------------------------------------|------------------------------------------------------------------------------------------------------------------------------------------------------|
| The number of and type of publicly-available statements from food companies expressing support / non-support for healthier processed foods.                                                                                                                                                                               | <p>Company media releases</p> <p>Company statements</p> <p>Company news / comments featured in electronic press</p> | <p>Internet; company websites, trade and public health newsletters</p>                        | <p>Count of statements / media items</p>                                                                                                             |
| The number of food companies with a nutrition policy published on their website.                                                                                                                                                                                                                                          | <p>Nutrition policy</p> <p>Nutrition statement</p>                                                                  | <p>Company website</p>                                                                        | <p>Count of policies / statements</p>                                                                                                                |
| <p>The level of engagement with the non-government organisation, as measured by a count of pre-defined methods of communication from the food company.</p> <p>The number of companies supporting the use of salt replacers / technologies in food processing to reduce the quantity of sodium required in processing.</p> | <p>Email, formal meetings, presentations</p> <p>Survey questionnaire</p>                                            | <p>Advocacy activity logs</p> <p>Self-administered survey questionnaire</p>                   | <p>Count of communications by type</p> <p>Continuous and categorical measures relating to knowledge, attitudes and behaviours re. salt replacers</p> |
| The number of companies supporting national salt reduction initiatives.                                                                                                                                                                                                                                                   | <p>Public support for the Food and Health Dialogue</p>                                                              | <p>Food and Health Dialogue website</p>                                                       | <p>Count of companies and commitments</p>                                                                                                            |
| The number of companies providing evidence of planned salt reduction                                                                                                                                                                                                                                                      | <p>Shared plans / commitments to salt reduction</p>                                                                 | <p>Self-administered survey questionnaire</p> <p>Supporting statements. Public commitment</p> | <p>Count of plans / commitments</p>                                                                                                                  |
